# Supplementary material for: Interdependence and Contagion of Effect in the Agricultural Commodities Market: A Bibliometric Analysis
Source: Preprints.org preprint supplement (doi:10.20944/preprints202306.1078.v1), 2023-06-15
Supplement: Supplementary file 1 [file Table S1.docx]

**Table S1**: Database used in the research identifying the Study, Title and DOI. Arranged in descending order of publication date.

| **Study** | **Title** | **DOI** |
| --- | --- | --- |
| GONG X, 2022, J FUTURES MARK | TIME-VARYING PURE CONTAGION EFFECT BETWEEN ENERGY AND NONENERGY COMMODITY MARKETS | 10.1002/fut.22366 |
| ŽIVKOV D, 2022, AGRIBUSINESS | MULTISCALE DOWNSIDE RISK INTERDEPENDENCE BETWEEN THE MAJOR AGRICULTURAL COMMODITIES | 10.1002/agr.21749 |
| HRABYNSKA I, 2022, AGRIC RESOUR ECON | ECONOMIC IMPERATIVES OF FINANCIALIZATION OF AGRICULTURAL COMMODITY MARKETS | 10.51599/are.2022.08.03.01 |
| JIANG W, 2022, INT J ENVIRON RES PUBLIC HEALTH | THE ANALYSIS OF CAUSALITY AND RISK SPILLOVER BETWEEN CRUDE OIL AND CHINA’S AGRICULTURAL FUTURES | 10.3390/ijerph191710593 |
| TIWARI AK, 2022, ENERGY ECON | QUANTILE RISK SPILLOVERS BETWEEN ENERGY AND AGRICULTURAL COMMODITY MARKETS: EVIDENCE FROM PRE AND DURING COVID-19 OUTBREAK | 10.1016/j.eneco.2022.106235 |
| AKYILDIRIM E, 2022, ENERGY ECON | HOW CONNECTED IS THE AGRICULTURAL COMMODITY MARKET TO THE NEWS-BASED INVESTOR SENTIMENT? | 10.1016/j.eneco.2022.106174 |
| JIN J, 2022, INT REV ECON FINANC | DOES THE SDR STABILIZE INVESTING IN COMMODITIES? | 10.1016/j.iref.2022.05.005 |
| JUST M, 2022, ECON LETT | DYNAMIC SPILLOVER TRANSMISSION IN AGRICULTURAL COMMODITY MARKETS: WHAT HAS CHANGED AFTER THE COVID-19 THREAT? | 10.1016/j.econlet.2022.110671 |
| KUMAR P, 2022, RESOUR POLICY | SYSTEMIC SPILLOVER DYNAMICS OF CRUDE OIL WITH INDIAN FINANCIAL INDICATORS IN POST WPI REVISION AND COVID ERA | 10.1016/j.resourpol.2022.102773 |
| CHEN Z, 2022, REV DEV ECON | DYNAMIC CORRELATION BETWEEN CRUDE OIL AND AGRICULTURAL FUTURES MARKETS | 10.1111/rode.12885 |
| DHAENE G, 2022, J FUTURES MARK | VOLATILITY SPILLOVERS: A SPARSE MULTIVARIATE GARCH APPROACH WITH AN APPLICATION TO COMMODITY MARKETS | 10.1002/fut.22312 |
| KUMAR P, 2022, J QUAN ECON | EXAMINING THE TIME VARYING SPILLOVER DYNAMICS OF INDIAN FINANCIAL INDICTORS FROM GLOBAL AND LOCAL ECONOMIC UNCERTAINTY | 10.1007/s40953-022-00333-8 |
| GHOSH M, 2022, J ASIAN AFR STUD | INSTITUTIONAL REFORMS AND SPATIAL EFFICIENCY IN AGRICULTURAL SUPPLY CHAINS IN INDIA | 10.1177/00219096221143128 |
| QIAO T, 2022, J FUTURES MARK | COVID-19 AND TAIL RISK CONTAGION ACROSS COMMODITY FUTURES MARKETS | 10.1002/fut.22388 |
| BONATO M, 2022, J FORECAST | EL NIÑO, LA NIÑA, AND FORECASTABILITY OF THE REALIZED VARIANCE OF AGRICULTURAL COMMODITY PRICES: EVIDENCE FROM A MACHINE LEARNING APPROACH | 10.1002/for.2914 |
| LU R, 2022, STUD ECON FINANC | VIX AND MAJOR AGRICULTURAL FUTURE MARKETS: DYNAMIC LINKAGE AND TIME-FREQUENCY RELATIONS AROUND THE COVID-19 OUTBREAK | 10.1108/SEF-02-2022-0121 |
| PAUL RK, 2022, CURR SCI | THE VOLATILITY SPILLOVER OF POTATO PRICES IN DIFFERENT MARKETS OF INDIA | 10.18520/cs/v123/i3/482-487 |
| UMAR Z, 2022, APPL ECON | INFLUENCE OF UNCONVENTIONAL MONETARY POLICY ON AGRICULTURAL COMMODITIES FUTURES: NETWORK CONNECTEDNESS AND DYNAMIC SPILLOVERS OF RETURNS AND VOLATILITY | 10.1080/00036846.2022.2103084 |
| MAGLIOCCA NR, 2022, ECOL SOC | TWO OF A KIND? LARGE-SCALE LAND ACQUISITIONS AND COMMODITY FRONTIER EXPANSION IN ARGENTINA'S DRY CHACO | 10.5751/ES-13103-270225 |
| DEWAN P, 2022, J AGRIBUSINESS DEV EMERG ECONOMIES | HERDING AND SPILLOVER EFFECTS IN THE INDIAN COMMODITY FUTURES MARKET | 10.1108/JADEE-11-2021-0288 |
| IQBAL N, 2022, ANN OPER RES | MODELLING EXTREME RISK SPILLOVERS IN THE COMMODITY MARKETS AROUND CRISIS PERIODS INCLUDING COVID19 | 10.1007/s10479-022-04522-9 |
| JOUF C, 2022, ECOL ECON | EUROPEAN FARMERS’ RESPONSES TO HIGHER COMMODITY PRICES: CROPLAND EXPANSION OR FORESTLANDS PRESERVATION? | 10.1016/j.ecolecon.2021.107243 |
| MISHRA A, 2021, ECON BUS REV | AGRICULTURAL COMMODITIES: AN INTEGRATED APPROACH TO ASSESS THE VOLATILITY SPILLOVER AND DYNAMIC CONNECTEDNESS | 10.18559/ebr.2021.4.3 |
| JAMHARI J, 2021, BULG J AGRIC SCI | REGIONAL MARKET INTEGRATION, COVID-19, AND AGRICULTURAL TRADE PERFORMANCE IN SOUTHEAST ASIA |  |
| REBOREDO JC, 2021, RESOUR POLICY | DYNAMIC SPILLOVERS AND NETWORK STRUCTURE AMONG COMMODITY, CURRENCY, AND STOCK MARKETS | 10.1016/j.resourpol.2021.102266 |
| HUNG NT, 2021, RESOUR POLICY | OIL PRICES AND AGRICULTURAL COMMODITY MARKETS: EVIDENCE FROM PRE AND DURING COVID-19 OUTBREAK | 10.1016/j.resourpol.2021.102236 |
| UMAR Z, 2021, RESOUR POLICY | AGRICULTURAL COMMODITY MARKETS AND OIL PRICES: AN ANALYSIS OF THE DYNAMIC RETURN AND VOLATILITY CONNECTEDNESS | 10.1016/j.resourpol.2021.102147 |
| CHOWDHURY MAF, 2021, ENERGY | ASYMMETRIC EFFECT OF ENERGY PRICE ON COMMODITY PRICE: NEW EVIDENCE FROM NARDL AND TIME FREQUENCY WAVELET APPROACHES | 10.1016/j.energy.2021.120934 |
| KUMAR S, 2021, RESOUR POLICY | TIME-VARYING DEPENDENCE STRUCTURE BETWEEN OIL AND AGRICULTURAL COMMODITY MARKETS: A DEPENDENCE-SWITCHING COVAR COPULA APPROACH | 10.1016/j.resourpol.2021.102049 |
| ROUT BS, 2021, IIMB MANAGE REV | COMPETENCE AND EFFICACY OF COMMODITY FUTURES MARKET: DISSECTION OF PRICE DISCOVERY, VOLATILITY, AND HEDGING | 10.1016/j.iimb.2021.03.014 |
| BOURI E, 2021, INT REV ECON FINANC | THE REALIZED VOLATILITY OF COMMODITY FUTURES: INTERCONNECTEDNESS AND DETERMINANTS | 10.1016/j.iref.2021.01.006 |
| UMAR Z, 2021, PLOS ONE | RETURN AND VOLATILITY TRANSMISSION BETWEEN OIL PRICE SHOCKS AND AGRICULTURAL COMMODITIES | 10.1371/journal.pone.0246886 |
| DING Z, 2021, COMPLEXITY | THE IMPACT OF GEOPOLITICAL RISK ON SYSTEMIC RISK SPILLOVER IN COMMODITY MARKET: AN EMD-BASED NETWORK TOPOLOGY APPROACH | 10.1155/2021/2226944 |
| CHITETE M, 2021, AGREKON | ANALYSIS OF INTRA-REGION MARKET INTEGRATION AND SPATIAL PRICE TRANSMISSION IN GROUNDNUT MARKETS IN MALAWI | 10.1080/03031853.2021.1937246 |
| FRIMPONG S, 2021, COMPLEXITY | CAN GLOBAL ECONOMIC POLICY UNCERTAINTY DRIVE THE INTERDEPENDENCE OF AGRICULTURAL COMMODITY PRICES? EVIDENCE FROM PARTIAL WAVELET COHERENCE ANALYSIS | 10.1155/2021/8848424 |
| MORALES LE, 2021, INT FOOD AGRIBUS MANAGE REV | HOW HAS THE MINIMUM SUPPORT PRICE POLICY OF INDIA AFFECTED CROSS-COMMODITY PRICE LINKAGES? | 10.22434/IFAMR2020.0035 |
| HERNANDEZ JA, 2021, APPL ECON | SPILLOVERS AND PORTFOLIO OPTIMIZATION OF AGRICULTURAL COMMODITY AND GLOBAL EQUITY MARKETS | 10.1080/00036846.2020.1830937 |
| LUO J, 2021, APPL ECON | RISK CONTAGIONS BETWEEN GLOBAL OIL MARKETS AND CHINA’S AGRICULTURAL COMMODITY MARKETS UNDER STRUCTURAL BREAKS | 10.1080/00036846.2020.1808577 |
| FASANYA IO, 2020, J AGRIC FOOD RES | MODELING RETURN AND VOLATILITY SPILLOVERS AMONG FOOD PRICES IN NIGERIA | 10.1016/j.jafr.2020.100029 |
| ŽIVKOV D, 2020, BORSA ISTANB REV | SHORT AND LONG-TERM VOLATILITY TRANSMISSION FROM OIL TO AGRICULTURAL COMMODITIES – THE ROBUST QUANTILE REGRESSION APPROACH | 10.1016/j.bir.2020.10.008 |
| BALCILAR M, 2020, J ECON STRUCT | SPILLOVER DYNAMICS ACROSS PRICE INFLATION AND SELECTED AGRICULTURAL COMMODITY PRICES | 10.1186/s40008-020-0180-0 |
| DAHL RE, 2020, J COMMOD MARKETS | DYNAMICS OF VOLATILITY SPILLOVER IN COMMODITY MARKETS: LINKING CRUDE OIL TO AGRICULTURE | 10.1016/j.jcomm.2019.100111 |
| MOKNI K, 2020, REV FINANC ECON | EMPIRICAL ANALYSIS OF THE CROSS-INTERDEPENDENCE BETWEEN CRUDE OIL AND AGRICULTURAL COMMODITY MARKETS | 10.1002/rfe.1096 |
| THENMOZHI M, 2020, J EMERG MARK FINANCE | CRUDE OIL VOLATILITY TRANSMISSION ACROSS FOOD COMMODITY MARKETS: A MULTIVARIATE BEKK-GARCH APPROACH | 10.1177/0972652720927623 |
| R L M, 2020, J AGRIBUSINESS DEV EMERG ECONOMIES | PRICE DISCOVERY AND VOLATILITY SPILLOVER: AN EMPIRICAL EVIDENCE FROM SPOT AND FUTURES AGRICULTURAL COMMODITY MARKETS IN INDIA | 10.1108/JADEE-10-2019-0175 |
| BALCILAR M, 2020, AGREKON | DO OIL PRICES AND EXCHANGE RATES ACCOUNT FOR AGRICULTURAL COMMODITY MARKET SPILLOVERS? EVIDENCE FROM THE DIEBOLD AND YILMAZ INDEX | 10.1080/03031853.2019.1694046 |
| WANG H-Y, 2020, J STAT MECH THEORY EXP | MULTIVARIATE CORRELATION ANALYSIS OF AGRICULTURAL FUTURES AND SPOT MARKETS BASED ON MULTIFRACTAL STATISTICAL METHODS | 10.1088/1742-5468/ab900f |
| HERWARTZ H, 2020, AGRIC ECON | FOOD–OIL VOLATILITY SPILLOVERS AND THE IMPACT OF DISTINCT BIOFUEL POLICIES ON PRICE UNCERTAINTIES ON FEEDSTOCK MARKETS | 10.1111/agec.12561 |
| YIP PS, 2020, INT REV FINANC ANAL | DYNAMIC VOLATILITY SPILLOVER EFFECTS BETWEEN OIL AND AGRICULTURAL PRODUCTS | 10.1016/j.irfa.2020.101465 |
| LI Z, 2020, FRONT ENERGY RES | DYNAMIC SPILLOVERS BETWEEN INTERNATIONAL CRUDE OIL MARKET AND CHINA'S COMMODITY SECTORS: EVIDENCE FROM TIME-FREQUENCY PERSPECTIVE OF STOCHASTIC VOLATILITY | 10.3389/fenrg.2020.00045 |
| VU TN, 2020, AGRIC | THE DETERMINANTS OF RISK TRANSMISSION BETWEEN OIL AND AGRICULTURAL PRICES: AN IPVAR APPROACH | 10.3390/agriculture10040120 |
| SAYED A, 2020, EURASIAN ECON REV | VOLATILITY TRANSMISSION IN THE SOUTH AFRICAN WHITE MAIZE FUTURES MARKET | 10.1007/s40822-019-00128-y |
| CHATZIANTONIOU I, 2020, ENERGY J | OIL PRICE VOLATILITY IS EFFECTIVE IN PREDICTING FOOD PRICE VOLATILITY. OR IS IT? | 10.5547/01956574.42.6.ICHA |
| PALANSKA T, 2020, FINANC UVER CZECH J ECON FINANC | MEASUREMENT OF VOLATILITY SPILLOVERS AND ASYMMETRIC CONNECTEDNESS ON COMMODITY AND EQUITY MARKETS |  |
| DE CARVALHO JC, 2020, REV ECON SOCIOL RURAL | PRICE VOLATILITY TRANSMISSIONS BETWEEN BRAZILIAN AGRICULTURAL COMMODITIES [TRANSMISSÕES DE VOLATILIDADE DE PREÇOS ENTRE COMMODITIES AGRÍCOLAS BRASILEIRAS] | 10.1590/1806-9479.2020.193763 |
| PAL D, 2020, APPL ECON | TIME-FREQUENCY DYNAMICS OF RETURN SPILLOVER FROM CRUDE OIL TO AGRICULTURAL COMMODITIES | 10.1080/00036846.2020.1764482 |
| YUAN X, 2020, SUSTAINABILITY | MODELING CO-MOVEMENT AMONG DIFFERENT AGRICULTURAL COMMODITY MARKETS: A COPULA-GARCH APPROACH | 10.3390/SU12010393 |
| BEN ABDALLAH M, 2020, AGRIC ECON | ANALYSIS OF MEAT PRICE VOLATILITY AND VOLATILITY SPILLOVERS IN FINLAND | 10.17221/158/2019-AGRICECON |
| BARBAGLIA L, 2020, ENERGY ECON | VOLATILITY SPILLOVERS IN COMMODITY MARKETS: A LARGE T-VECTOR AUTOREGRESSIVE APPROACH | 10.1016/j.eneco.2019.104555 |
| DE ARAUJO FHA, 2019, ENTROPY | PERMUTATION ENTROPY AND STATISTICAL COMPLEXITY ANALYSIS OF BRAZILIAN AGRICULTURAL COMMODITIES | 10.3390/e21121220 |
| ROUT BS, 2019, VISION | VOLATILITY SPILLOVER EFFECT IN COMMODITY DERIVATIVES MARKET: EMPIRICAL EVIDENCE THROUGH GENERALIZED IMPULSE RESPONSE FUNCTION | 10.1177/0972262919850916 |
| BONATO M, 2019, J INT FINANC MARK INST MONEY | REALIZED CORRELATIONS, BETAS AND VOLATILITY SPILLOVER IN THE AGRICULTURAL COMMODITY MARKET: WHAT HAS CHANGED? | 10.1016/j.intfin.2019.07.005 |
| HAMULCZUK M, 2019, LAND USE POLICY | SEARCHING FOR MARKET INTEGRATION: EVIDENCE FROM UKRAINIAN AND EUROPEAN UNION RAPESEED MARKETS | 10.1016/j.landusepol.2019.104078 |
| SERLETIS A, 2019, J COMMOD MARKETS | THE ETHANOL MANDATE AND CRUDE OIL AND BIOFUEL AGRICULTURAL COMMODITY PRICE DYNAMICS | 10.1016/j.jcomm.2018.07.001 |
| DA SILVA RFB, 2019, FOR POLICY ECON | ECO-CERTIFICATION PROTOCOLS AS MECHANISMS TO FOSTER SUSTAINABLE ENVIRONMENTAL PRACTICES IN TELECOUPLED SYSTEMS | 10.1016/j.forpol.2019.05.016 |
| HERNANDEZ JA, 2019, RESOUR POLICY | CAN AGRICULTURAL AND PRECIOUS METAL COMMODITIES DIVERSIFY AND HEDGE EXTREME DOWNSIDE AND UPSIDE OIL MARKET RISK? AN EXTREME QUANTILE APPROACH | 10.1016/j.resourpol.2018.11.007 |
| JI Q, 2019, ENERGY ECON | INFORMATION INTERDEPENDENCE AMONG ENERGY, CRYPTOCURRENCY AND MAJOR COMMODITY MARKETS | 10.1016/j.eneco.2019.06.005 |
| WEI SU C, 2019, ENERGY | DO OIL PRICES DRIVE AGRICULTURAL COMMODITY PRICES? FURTHER EVIDENCE IN A GLOBAL BIO-ENERGY CONTEXT | 10.1016/j.energy.2019.02.028 |
| SIAMI-NAMINI S, 2019, AGRIBUSINESS | COMMODITY PRICE VOLATILITY AND U.S. MONETARY POLICY: COMMODITY PRICE OVERSHOOTING REVISITED | 10.1002/agr.21564 |
| BRAHA K, 2019, AGRIS ON-LINE PAP ECON INF | EVIDENCE OF SPATIAL PRICE TRANSMISSION IN THE CASE OF KOSOVO | 10.7160/aol.2019.110101 |
| LU Y, 2019, SUSTAINABILITY | VOLATILITY SPILLOVERS BETWEEN CRUDE OIL AND AGRICULTURAL COMMODITY MARKETS SINCE THE FINANCIAL CRISIS | 10.3390/su11020396 |
| KE Y, 2019, SUSTAINABILITY | RISK TRANSMISSION BETWEEN CHINESE AND U.S. AGRICULTURAL COMMODITY FUTURES MARKETS-A COVAR APPROACH | 10.3390/su11010239 |
| ŽIVKOV LD, 2019, ECON COMPUT ECON CYBERN STUD RES | HOW DO OIL PRICE CHANGES IMPACT THE MAJOR AGRICULTURAL COMMODITIES IN DIFFERENT MARKET CONDITIONS AND IN DIFFERENT TIME-HORIZONS? | 10.24818/18423264/53.4.19.10 |
| CHIOU–WEI S-Z, 2019, ENERGY J | ENERGY AND AGRICULTURAL COMMODITY MARKETS INTERACTION: AN ANALYSIS OF CRUDE OIL, NATURAL GAS, CORN, SOYBEAN, AND ETHANOL PRICES | 10.5547/01956574.40.2.schi |
| FERNANDEZ-DIAZ JM, 2019, RES INT BUS FINANC | INTERDEPENDENCE AMONG AGRICULTURAL COMMODITY MARKETS, MACROECONOMIC FACTORS, CRUDE OIL AND COMMODITY INDEX | 10.1016/j.ribaf.2018.07.009 |
| CANDILA V, 2018, RISKS | ON THE VOLATILITY SPILLOVER BETWEEN AGRICULTURAL COMMODITIES AND LATIN AMERICAN STOCK MARKETS | 10.3390/risks6040116 |
| LUO J, 2018, ENERGY ECON | HIGH-FREQUENCY VOLATILITY CONNECTEDNESS BETWEEN THE US CRUDE OIL MARKET AND CHINA'S AGRICULTURAL COMMODITY MARKETS | 10.1016/j.eneco.2018.10.031 |
| JI Q, 2018, ENERGY ECON | RISK SPILLOVER BETWEEN ENERGY AND AGRICULTURAL COMMODITY MARKETS: A DEPENDENCE-SWITCHING COVAR-COPULA MODEL | 10.1016/j.eneco.2018.08.015 |
| SHAHZAD SJH, 2018, ENERGY POLICY | ASYMMETRIC RISK SPILLOVERS BETWEEN OIL AND AGRICULTURAL COMMODITIES | 10.1016/j.enpol.2018.03.074 |
| CHANG C-L, 2018, ENERGIES | VOLATILITY SPILLOVERS BETWEEN ENERGY AND AGRICULTURAL MARKETS: A CRITICAL APPRAISAL OF THEORY AND PRACTICE | 10.3390/en11061595 |
| ZAFEIRIOU E, 2018, SUSTAINABILITY | AGRICULTURAL COMMODITY AND CRUDE OIL PRICES: AN EMPIRICAL INVESTIGATION OF THEIR RELATIONSHIP | 10.3390/su10041199 |
| GUPTA CP, 2018, VIKALPA | AGRICULTURAL COMMODITY TRADING: IS IT DESTABILIZING SPOT MARKETS? | 10.1177/0256090917750263 |
| TANKARI MR, 2018, AGRIC ECON | NONTRADED FOOD COMMODITY SPATIAL PRICE TRANSMISSION: EVIDENCE FROM THE NIGER MILLET MARKET | 10.1111/agec.12404 |
| CHEN Q, 2018, EMERG MARK FINANC TRADE | INFORMATION FLOWS BETWEEN THE US AND CHINA’S AGRICULTURAL COMMODITY FUTURES MARKETS—BASED ON VAR–BEKK–SKEW-T MODEL | 10.1080/1540496X.2016.1230492 |
| SIERRA LP, 2018, GLOBAL ECON J | WHAT IS THE SPILLOVER EFFECT OF THE U.S. EQUITY AND MONEY MARKET ON THE KEY LATIN AMERICAN AGRICULTURAL EXPORTS? | 10.1515/gej-2018-0060 |
| SAGHAIAN S, 2018, J AGRIC RESOUR ECON | ASYMMETRIC PRICE VOLATILITY TRANSMISSION BETWEEN U.S. BIOFUEL, CORN, AND OIL MARKETS |  |
| HAMADI H, 2017, RES INT BUS FINANC | NEWS SURPRISES AND VOLATILITY SPILLOVER AMONG AGRICULTURAL COMMODITIES: THE CASE OF CORN, WHEAT, SOYBEAN AND SOYBEAN OIL | 10.1016/j.ribaf.2017.04.006 |
| HAASE M, 2017, J ALTERN INVESTM | COMMODITY RETURNS AND THEIR VOLATILITY IN RELATION TO SPECULATION: A CONSISTENT EMPIRICAL APPROACH | 10.3905/jai.2017.20.2.076 |
| ARNADE C, 2017, J COMMOD MARKETS | AGRICULTURAL PRICE TRANSMISSION: CHINA RELATIONSHIPS WITH WORLD COMMODITY MARKETS | 10.1016/j.jcomm.2017.07.001 |
| JIANG H, 2017, APPL ECON | DYNAMICS OF VOLATILITY TRANSMISSION BETWEEN THE U.S. AND THE CHINESE AGRICULTURAL FUTURES MARKETS | 10.1080/00036846.2016.1262517 |
| ALGIERI B, 2017, FOOD POLICY | A TALE OF TWO TAILS: EXPLAINING EXTREME EVENTS IN FINANCIALIZED AGRICULTURAL MARKETS | 10.1016/j.foodpol.2017.05.004 |
| KANG SH, 2017, ENERGY ECON | DYNAMIC SPILLOVER EFFECTS AMONG CRUDE OIL, PRECIOUS METAL, AND AGRICULTURAL COMMODITY FUTURES MARKETS | 10.1016/j.eneco.2016.12.011 |
| ANSOFINO, 2017, INT J ECON RES | TOWARDS ECONOMIC LINKAGES AND MARKET INTEGRATION IN FACING ASEAN ECONOMIC COMMUNITY: CASE STUDY WEST SUMATRA ECONOMY |  |
| APERGIS N, 2017, INT J ENERGY ECON POLICY | ASYMMETRIC SPILLOVER EFFECTS BETWEEN AGRICULTURAL COMMODITY PRICES AND BIOFUEL ENERGY PRICES |  |
| BERGMANN D, 2016, AGRIC FOOD ECON | AN ANALYSIS OF PRICE AND VOLATILITY TRANSMISSION IN BUTTER, PALM OIL AND CRUDE OIL MARKETS | 10.1186/s40100-016-0067-4 |
| AWARTANI B, 2016, J COMMOD MARKETS | THE CONNECTEDNESS BETWEEN CRUDE OIL AND FINANCIAL MARKETS: EVIDENCE FROM IMPLIED VOLATILITY INDICES | 10.1016/j.jcomm.2016.11.002 |
| JIANG H, 2016, J FUTURES MARK | SPILLOVERS AND DIRECTIONAL PREDICTABILITY WITH A CROSS-QUANTILOGRAM ANALYSIS: THE CASE OF U.S. AND CHINESE AGRICULTURAL FUTURES | 10.1002/fut.21779 |
| CARTWRIGHT PA, 2016, REV QUANT FINANC ACCOUNT | FURTHER EVIDENCE ON THE EXPLANATORY POWER OF SPOT FOOD AND ENERGY COMMODITIES MARKET PRICES FOR FUTURES PRICES | 10.1007/s11156-015-0513-5 |
| GOZGOR G, 2016, J INT FINANC MARK INST MONEY | COMMODITY MARKETS VOLATILITY TRANSMISSION: ROLES OF RISK PERCEPTIONS AND UNCERTAINTY IN FINANCIAL MARKETS | 10.1016/j.intfin.2016.04.008 |
| BALDI L, 2016, RES INT BUS FINANC | STOCK MARKETS' BUBBLES BURST AND VOLATILITY SPILLOVERS IN AGRICULTURAL COMMODITY MARKETS | 10.1016/j.ribaf.2016.04.020 |
| SILVENNOINEN A, 2016, J FUTURES MARK | CRUDE OIL AND AGRICULTURAL FUTURES: AN ANALYSIS OF CORRELATION DYNAMICS | 10.1002/fut.21770 |
| GARDEBROEK C, 2016, AGRIC ECON | MARKET INTERDEPENDENCE AND VOLATILITY TRANSMISSION AMONG MAJOR CROPS | 10.1111/agec.12184 |
| BRAHMAIAH B, 2016, INT J ECON RES | PRICE DISCOVERY AND VOLATILITY SPILLOVER EFFECT IN INDIAN AGRICULTURE COMMODITY MARKET |  |
| GUTIERREZ L, 2015, AM J AGRIC ECON | A GLOBAL VECTOR AUTOREGRESSION MODEL FOR THE ANALYSIS OF WHEAT EXPORT PRICES | 10.1093/ajae/aau103 |
| GOZGOR G, 2015, AGRIC ECON | PRICE VOLATILITY SPILLOVERS AMONG AGRICULTURAL COMMODITY AND CRUDE OIL MARKETS: EVIDENCE FROM THE RANGE-BASED ESTIMATOR | 10.17221/162/2014-AGRICECON |
| FLACHSBARTH I, 2014, SPAN J AGRIC RES | THE EFFECTS OF AGRICULTURAL TRADE OPENNESS ON FOOD PRICE TRANSMISSION IN LATIN AMERICAN COUNTRIES | 10.5424/sjar/2014124-6292 |
| BAQUEDANO FG, 2014, FOOD POLICY | MARKET INTEGRATION AND PRICE TRANSMISSION IN CONSUMER MARKETS OF DEVELOPING COUNTRIES | 10.1016/j.foodpol.2013.11.001 |
| ROSA F, 2014, BIO-BASED APPL ECONOMICS | AGRICULTURAL AND OIL COMMODITIES: PRICE TRANSMISSION AND MARKET INTEGRATION BETWEEN US AND ITALY | 10.13128/BAE-12944 |
| KAVUSSANOS MG, 2014, TRANSP RES PART E LOGIST TRANSP REV | ECONOMIC SPILLOVERS BETWEEN RELATED DERIVATIVES MARKETS: THE CASE OF COMMODITY AND FREIGHT MARKETS | 10.1016/j.tre.2014.05.003 |
| MENSI W, 2014, ENERGY ECON | DYNAMIC SPILLOVERS AMONG MAJOR ENERGY AND CEREAL COMMODITY PRICES | 10.1016/j.eneco.2014.03.004 |
| HERNANDEZ MA, 2014, EUR REV AGRIC ECON | HOW FAR DO SHOCKS MOVE ACROSS BORDERS? EXAMINING VOLATILITY TRANSMISSION IN MAJOR AGRICULTURAL FUTURES MARKETS | 10.1093/erae/jbt020 |
| BECKMANN J, 2014, ECON MODEL | VOLATILITY TRANSMISSION IN AGRICULTURAL FUTURES MARKETS | 10.1016/j.econmod.2013.09.036 |
| MANERA M, 2013, ENERGY J | FINANCIAL SPECULATION IN ENERGY AND AGRICULTURE FUTURES MARKETS: A MULTIVARIATE GARCH APPROACH | 10.5547/01956574.34.3.4 |
| CHEVALLIER J, 2013, APPL ECON LETT | VOLATILITY SPILLOVERS IN COMMODITY MARKETS | 10.1080/13504851.2013.799748 |
| FLEMING DA, 2013, FOOD POLICY | DOES AGRICULTURAL TRADE AFFECT PRODUCTIVITY? EVIDENCE FROM CHILEAN FARMS | 10.1016/j.foodpol.2013.04.004 |
| NAZLIOGLU S, 2013, ENERGY ECON | VOLATILITY SPILLOVER BETWEEN OIL AND AGRICULTURAL COMMODITY MARKETS | 10.1016/j.eneco.2012.11.009 |
| JIANG Y, 2013, AGRIC ECON | IS CHINA'S DOMESTIC AGRICULTURAL MARKET INFLUENCED BY PRICE FLUCTUATIONS OF THE WORLD AGRICULTURAL COMMODITIES IN THE SHORT-RUN? | 10.17221/54/2013-agricecon |
| LAHIANI A, 2013, J APPL BUS RES | UNDERSTANDING RETURN AND VOLATILITY SPILLOVERS AMONG MAJOR AGRICULTURAL COMMODITIES | 10.19030/jabr.v29i6.8214 |
| REBOREDO JC, 2012, ENERGY POLICY | DO FOOD AND OIL PRICES CO-MOVE? | 10.1016/j.enpol.2012.06.035 |
| BAQUEDANO FG, 2011, AGRIC ECON | WORLD MARKET INTEGRATION FOR EXPORT AND FOOD CROPS IN DEVELOPING COUNTRIES: A CASE STUDY FOR MALI AND NICARAGUA | 10.1111/j.1574-0862.2011.00540.x |
| ABBOTT P, 2011, J AFR ECON | RECENT GLOBAL FOOD PRICE SHOCKS: CAUSES, CONSEQUENCES AND LESSONS FOR AFRICAN GOVERNMENTS AND DONORS | 10.1093/jae/ejr007 |
| DU X, 2011, ENERGY ECON | SPECULATION AND VOLATILITY SPILLOVER IN THE CRUDE OIL AND AGRICULTURAL COMMODITY MARKETS: A BAYESIAN ANALYSIS | 10.1016/j.eneco.2010.12.015 |
| KUMAR B, 2011, BOGAZICI J | PRICE DISCOVERY IN EMERGING COMMODITY MARKETS: SPOT AND FUTURES RELATIONSHIP IN INDIAN COMMODITY FUTURES MARKET | 10.21773/boun.25.1.4 |
| DE MATTOS LB, 2009, REV ECON SOCIOL RURAL | INTEGRAÇÃO ESPACIAL DE MERCADOS NA PRESENÇA DE CUSTOS DE TRANSAÇÃO: UM ESTUDO PARA O MERCADO DE BOI GORDO EM MINAS GERAIS E SÃO PAULO | 10.1590/S0103-20032009000100009 |
| OLADAPO MO, 2008, AFR DEV REV | PRICE TRANSMISSION AND MARKET INTEGRATION IN OYO STATE, NIGERIA | 10.1111/j.1467-8268.2008.00195.x |
| HUANG J, 2004, WORLD BANK ECON REV | TRACKING DISTORTIONS IN AGRICULTURE: CHINA AND ITS ACCESSION TO THE WORLD TRADE ORGANIZATION | 10.1093/wber/lhh033 |
| TAHIR Z, 1997, PAK DEV REV | INTEGRATION OF AGRICULTURAL COMMODITY MARKETS IN PUNJAB | 10.30541/v36i3pp.241-262 |
