# Supplementary material for: Interdependence and Contagion of Effect in the Agricultural Commodities Market: A Bibliometric Analysis
Source: Preprints.org preprint supplement (doi:10.20944/preprints202306.1078.v1), 2023-06-15
Supplement: Supplementary file 2 [file Table S2.docx]

**Table S2**: General description about database. The description is divided into: Main information about data, Document contents, Authors, Authors collaboration and Document types.

| **Description** | **Results** |
| --- | --- |
| **Main about data** |  |
| Timespan | 1997:2022 |
| Sources (Journals, Books, etc) | 79 |
| Documents | 127 |
| Annual Growth Rate % | 13.16 |
| Document Average Age | 4.87 |
| Average citations per doc | 26.54 |
| References | 5512 |
| **Document contents** |  |
| Keywords Plus (ID) | 420 |
| Author's Keywords (DE) | 384 |
| **Authors** |  |
| Authors | 324 |
| Authors of single-authored docs | 5 |
| **Authors collaboration** |  |
| Single-authored docs | 5 |
| Co-Authors per Doc | 2.92 |
| International co-authorships % | 37.8 |
| **Document Types** |  |
| Article | 127 |
